# Supplementary material for: Nestin+ Mesenchymal Precursors Generate Distinct Spleen Stromal Cell Subsets and Have Immunomodulatory Function
Source: Int J Mol Sci. 2022 Oct 5;23(19):11819. doi: 10.3390/ijms231911819 (PMC9569994; doi:10.3390/ijms231911819)
Supplement: Supplementary file 1 [file ijms-23-11819-s001.zip › ijms-1872474-supplementary.pdf]

Supplementary Materials:

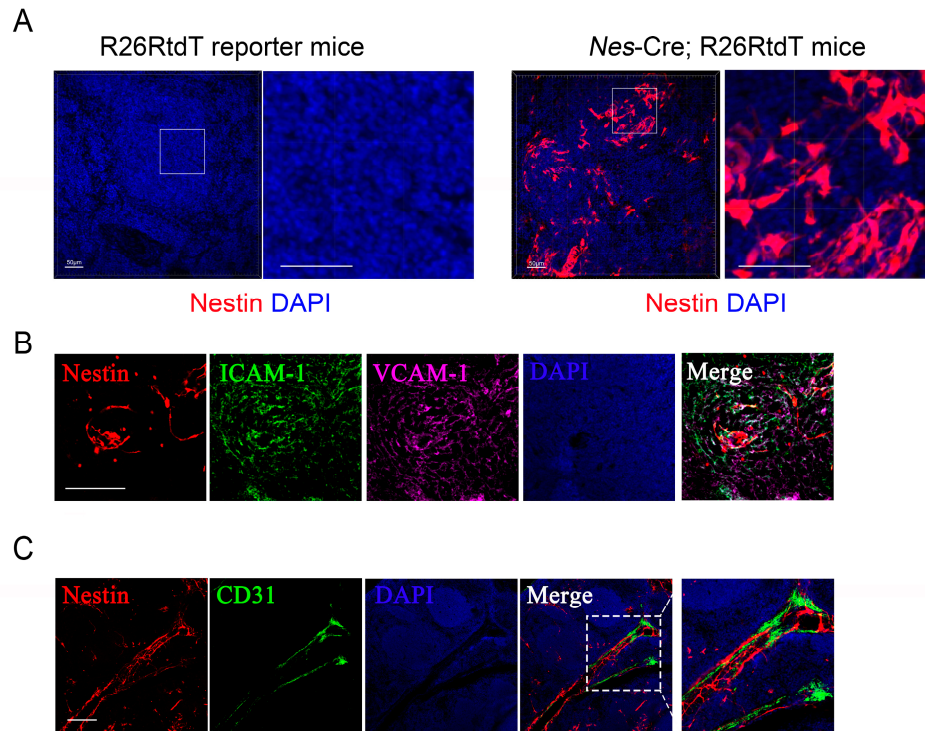

**Figure S1. Characterization of Nestin expression in the spleen.** (A) Characterization of Nestin expression in the spleen via *R26RtdT* reporter mice and *Nes-Cre; R26RtdT* mice (red). Nuclei were counterstained with DAPI (blue). Scale bar, 50  $\mu$ m. (B) Immunohistochemical analyses showed the colocalization of Nestin (red) with ICAM-1 (green) and VCAM-1 (purple) in the spleen. Nuclei were counterstained with DAPI (blue). Scale bar, 50  $\mu$ m. (C) Immunohistochemical analyses of the colocalization between Nestin (red) and CD31 (green) in the spleen. Nuclei were counterstained with DAPI (blue). Scale bar, 50  $\mu$ m.

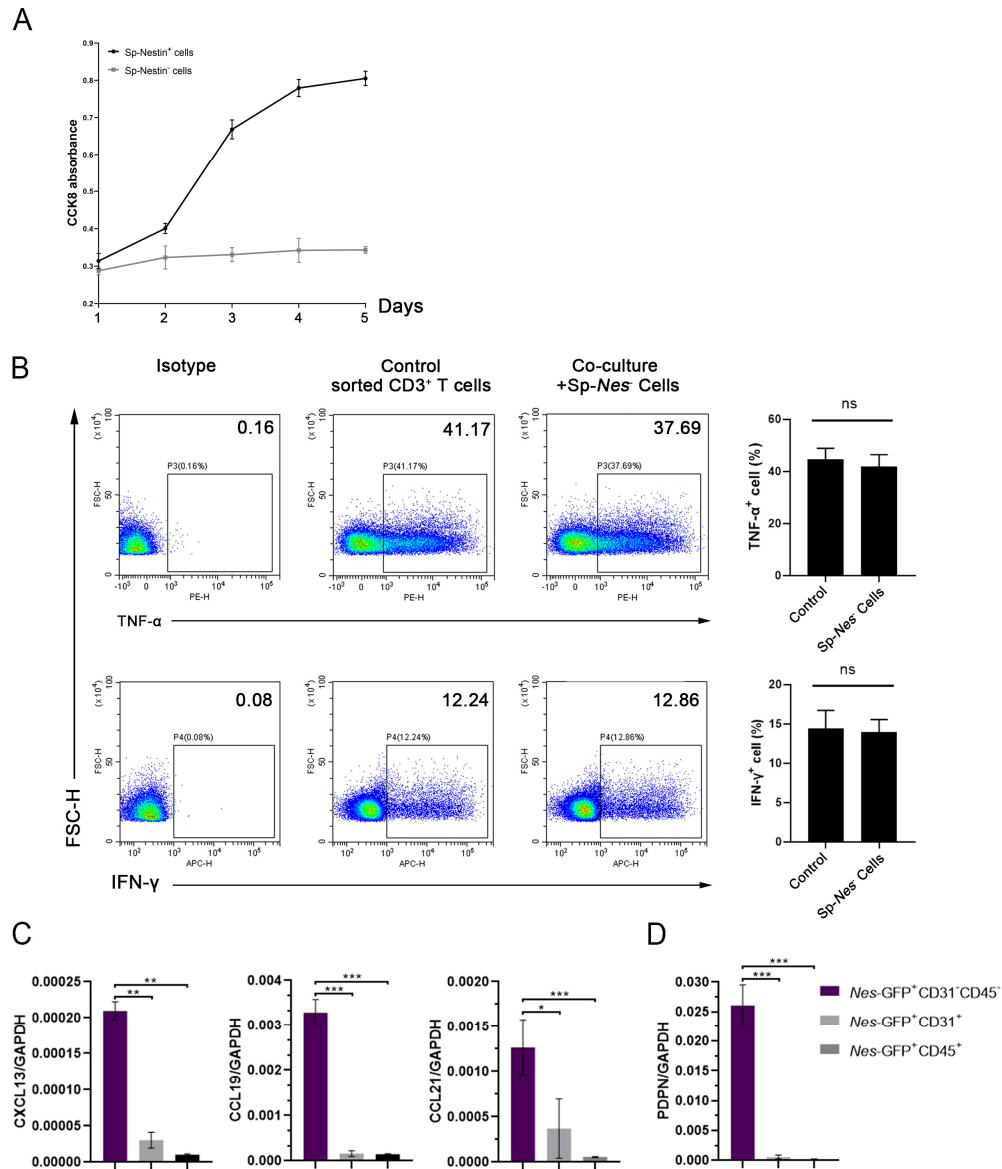

**Figure S2. The proliferation ability and immunosuppressive properties of *Nes-GFP<sup>-</sup>* cells and *Nes-GFP<sup>+</sup>* cells and characterization of *Nes-GFP<sup>+</sup>* cells from the spleen.** (A) The proliferation rates of the spleen *Nes-GFP<sup>-</sup>* cells and *Nes-GFP<sup>+</sup>* cells were assessed using the CCK8 assay and were shown to be different.  $n=3$ . Data are expressed as the mean  $\pm$  SEM. (B) *Nes-GFP<sup>-</sup>* cells were cocultured with sorted CD3<sup>+</sup> T cells, and the pro-inflammatory cytokine TNF- $\alpha$  and IFN- $\gamma$  secretion of T cells were evaluated by flow cytometry.  $n=3$ . Data are expressed as the mean  $\pm$  SEM. ns, no significant difference. (C, D) qRT-PCR analysis of *Nes-GFP<sup>+</sup>CD31<sup>+</sup>CD45<sup>-</sup>*, *Nes-GFP<sup>+</sup>CD31<sup>+</sup>*, *Nes-GFP<sup>+</sup>CD45<sup>+</sup>* cell expressions in the spleen. \*  $p < 0.05$ , \*\*  $p < 0.01$ , \*\*\*  $p < 0.001$ .

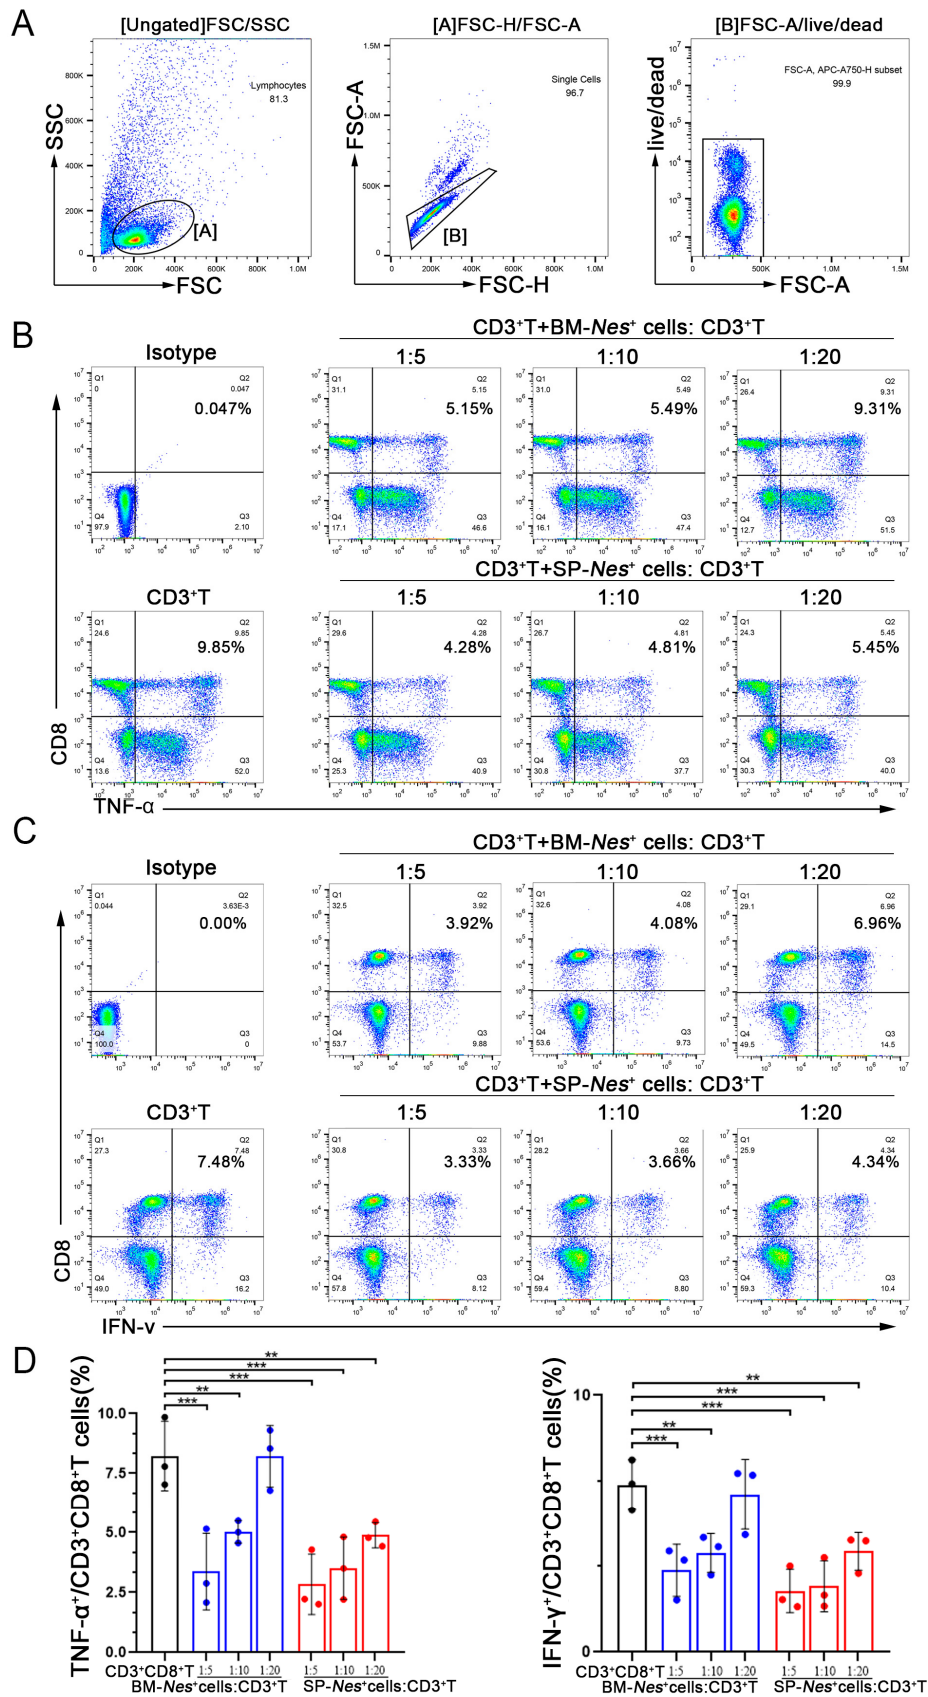

**Figure S3. Immunosuppressive properties of Nes-GFP<sup>+</sup> cells (T cells pro-inflammatory cytokine suppression assay).** (A) Sorted T cells were collected and stained with Live/Dead before further analysis by flow cytometry. Data show representative results of the staining. (B) Nes-GFP<sup>+</sup> cells were cocultured with sorted CD3<sup>+</sup> T cells, and the pro-inflammatory cytokine TNF- $\alpha$  secretion of CD3<sup>+</sup>CD8<sup>+</sup>T cells were evaluated by flow cytometry. Representative plots of TNF- $\alpha$  production by T

cells at different ratio. n=3. (C) *Nes*-GFP<sup>+</sup> cells were cocultured with sorted CD3<sup>+</sup> T cells, and the pro-inflammatory cytokine IFN- $\gamma$  secretion of CD3<sup>+</sup>CD8<sup>+</sup>T cells were evaluated by flow cytometry. Representative plots of IFN- $\gamma$  production by T cells at different ratio. n=3. (D) Bar graphs show the inhibition rate of TNF- $\alpha$  and IFN- $\gamma$  producing CD3<sup>+</sup>CD8<sup>+</sup> T cells after coculture with *Nes*-GFP<sup>+</sup> cells. Data represent mean values  $\pm$  SD of three independent experiments. \*\*P < 0.01, \*\*\*P < 0.001.

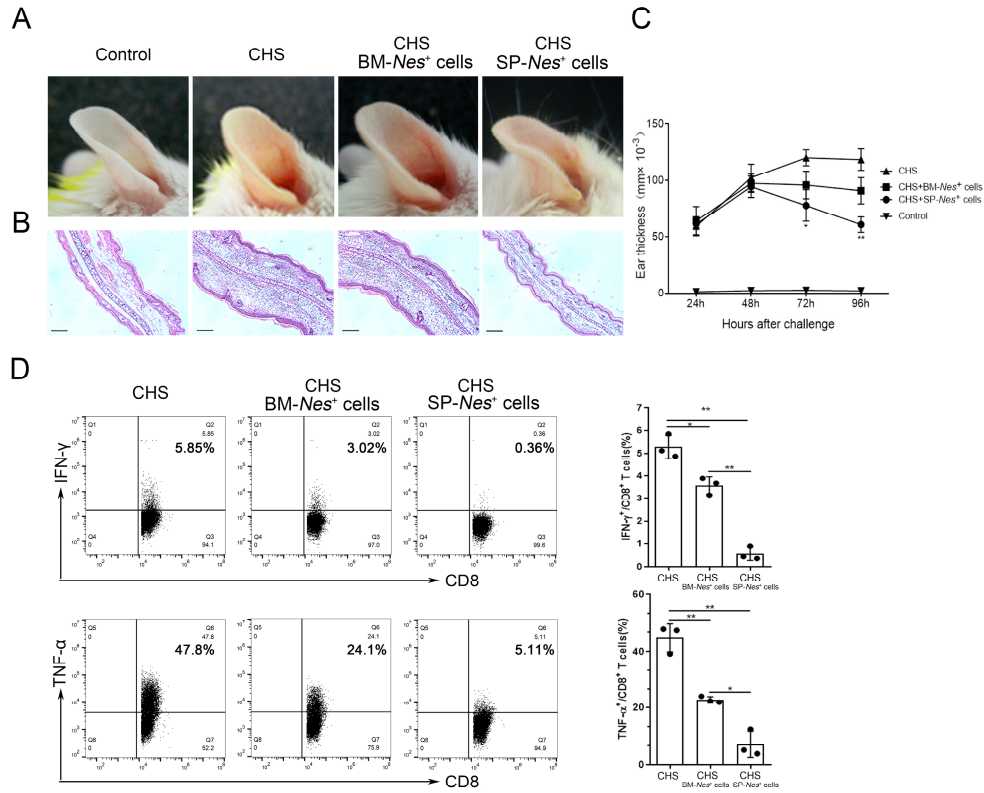

**Figure S4. Injection of *Nes*-GFP<sup>+</sup> cells attenuated CHS.** (A-C) Therapeutic efficacy evaluation of CHS model, including (A) Representative photos of ears from mice in different groups, (B) Representative images of H&E-stained ear samples from mice in different groups. Scale bars, 100  $\mu$ m, (C) Ear thickness was measured in the different experimental groups at the indicated times post challenge. (D) Representative plots of IFN- $\gamma$  and TNF- $\alpha$  producing CD8<sup>+</sup> T cells within cervical LN cells and bar chart showing the quantification. \*  $p < 0.05$ , \*\*  $p < 0.01$ .

**Table S1.** Sequence of Specific Primers Used for qRT-PCR Analysis:

| Gene   | Forward Sequence (5'-3')    | Reverse Sequence (5'-3')    |
|--------|-----------------------------|-----------------------------|
| GAPDH  | ACCACAGTCCATGCCATCAC        | TCCACCACCCTGTTGCTGTA        |
| Nestin | AGGAGAAGCAGGGTC-<br>TACAGAG | AGTTCTCAGCCTCCAG-<br>CAGAGT |

**Table S2.** Antibodies for Flow Cytometry.

| <b>Antigen</b>                    | <b>Source</b>  | <b>Dilution</b> | <b>Identifier</b> |
|-----------------------------------|----------------|-----------------|-------------------|
| Anti-mouse CD106 (AF647)          | Biolegend      | 1:100           | 105712            |
| Anti-mouse CD29 (PE)              | BD Biosciences | 1:100           | 562801            |
| Anti-mouse PDPN (ef660)           | eBioscience    | 1:100           | 50-5381-80        |
| Anti-mouse CD90 (PE)              | eBioscience    | 1:100           | 12-0902-81        |
| Anti-mouse CD31 (PE)              | BD Biosciences | 1:100           | 553373            |
| Anti-mouse CD45 (APC)             | Invitrogen     | 1:100           | MCD4505           |
| Anti-mouse CD11c (PE)             | BD Biosciences | 1:100           | 561044            |
| Anti- mouse CD3 (V450)            | BD Biosciences | 1:100           | 560804            |
| Anti- mouse CD8 (APC)             | BD Biosciences | 1:100           | 553035            |
| Anti-mouse IFN- $\gamma$ (PE-Cy7) | BD Biosciences | 1:100           | 557649            |
| Anti-mouse TNF- $\alpha$ (PE)     | BD Biosciences | 1:100           | 554419            |
| Anti-mouse CD25 (APC)             | eBioscience    | 1:100           | 17-0251-81        |
| Anti-mouse CD69 (PE)              | Biolegend      | 1:100           | 104507            |
| Near-IR fluorescent reactive dye  | Invitrogen     | 1:1000          | L34967            |
| CellTrace™ Yellow                 | Invitrogen     | 1:1000          | C34573            |
| AF647 IgG2a, $\kappa$ Isotype     | Biolegend      | 1:100           | RTK2758           |
| PE IgG2, $\lambda$ 1 Isotype      | BD Biosciences | 1:100           | 553965            |
| APC IgG Isotype                   | Invitrogen     | 1:100           | 17-4914-81        |
| PE IgG2a, $\kappa$ Isotype        | Invitrogen     | 1:100           | 12-4321-80        |
| APC IgG2b, $\kappa$ Isotype       | Invitrogen     | 1:100           | PA5-33192         |
| PE IgG Isotype                    | Invitrogen     | 1:100           | 12-4888-83        |
| V450 IgG Isotype                  | Invitrogen     | 1:100           | 48-4914-80        |
| APC IgG2a, $\kappa$ Isotype       | BD Biosciences | 1:100           | 551139            |
| PE-Cy7 IgG1, $\kappa$ Isotype     | Biolegend      | 1:100           | RTK2071           |
| PE IgG1 Isotype                   | Biolegend      | 1:100           | MKG1-58           |
| APC IgG1 $\kappa$ Isotype         | Invitrogen     | 1:100           | 17-4301-82        |
| PE IgG Isotype                    | Biolegend      | 1:100           | HTK888            |

**Table S3.** Antibodies for Immunofluorescence Staining.

| <b>Antigen</b>              | <b>Source</b>  | <b>Dilution</b> | <b>Identifier</b> |
|-----------------------------|----------------|-----------------|-------------------|
| Rat anti-mouse ER-TR7       | AbD Serotec    | 1:100           | MCA2402           |
| Rat anti-mouse CD35         | BD Biosciences | 1:100           | 553816            |
| Rat anti-mouse MadCAM-1     | Abcam          | 1:100           | Ab254539          |
| Anti-mouse ICAM-1 (FITC)    | Invitrogen     | 1:100           | 11-0541-82        |
| Anti-mouse VCAM-1 (AF647)   | Biolegend      | 1:100           | 105712            |
| Anti-mouse CD31 (FITC)      | Invitrogen     | 1:100           | 11-0311-82        |
| Anti-mouse CD3 (AF647)      | Biolegend      | 1:100           | 152320            |
| Anti-mouse B220 (AF594)     | Biolegend      | 1:100           | 103254            |
| Goat Anti-rat IgG Alexa 594 | Invitrogen     | 1:500           | A11007            |
| Goat Anti-rat IgG Alexa 647 | Invitrogen     | 1:500           | A21247            |
